# Supplementary material for: Nutritional Considerations of Irish Performance Dietitians and Nutritionists in Concussion Injury Management
Source: MDPI journal article supplement (doi:10.3390/nu16040497), 2024-02-09
Supplement: s1 [file s1]

**Table S1.** Thematic Analysis (Phase 2). Initial code generation based on theoretical assumptions and research aims (semantic approach).

| Code                                                    | Code Description                                                                           |
|---------------------------------------------------------|--------------------------------------------------------------------------------------------|
| <b>CR: Concussion Injury Report</b>                     |                                                                                            |
| CR 1                                                    | Injury mentioned.                                                                          |
| CR 2                                                    | Interviewer probed (was not mentioned as a common injury)                                  |
| CR 3                                                    | Athlete                                                                                    |
| <b>CA: Concussion Awareness</b>                         |                                                                                            |
| CA1                                                     | Head injury/ concussion event awareness/ communication                                     |
| CA2                                                     | PN dealings with concussion injuries in athlete                                            |
| CA3                                                     | Blasé attitude to concussion injuries in rugby                                             |
| CA4                                                     | Timeframe for PN to support athletes' (acute period (<14 days))                            |
| CA5                                                     | PN previously experienced a concussion as an athlete                                       |
| CA6                                                     | PN no mention until probed (did not mentioned as a common injury)                          |
| CA7                                                     | Symptoms/ recovery need (rest, nausea...)                                                  |
| CA8                                                     | Protocols increasing injury risk/ sport – hydration/ drying out                            |
| <b>NC: Nutrition Consideration - Concussion Support</b> |                                                                                            |
| NC1                                                     | PN poor awareness/ no consideration/ no mention/ see link                                  |
| NC2                                                     | PN awareness – mentions/ logically considers nutrition specific to concussion/ researching |
| NC3                                                     | PN awareness – mentions referring out for nutrition support                                |
| NC4                                                     | PN new awareness/ comfort/ reassurance/ increased buy-in – nutrition                       |
| NC5                                                     | PN's Concussion Nutrition Protocols                                                        |
| <b>NP: Nutrition Protocol - Concussion Support</b>      |                                                                                            |
| NP1                                                     | Poor knowledge on concussion nutrition protocols                                           |
| NP2                                                     | Implementation of strategic overall nutrition support protocol                             |
| NP3                                                     | Implementation of dietary protocols to support brain healing/ recovery                     |
| NP4                                                     | Implementation novel protocols that may support brain healing/ recovery                    |
| NP5                                                     | No specific nutrition strategy for concussion recovery                                     |
| NP6                                                     | Appetite – not an issue in concussion                                                      |
| NP7                                                     | Athlete adherence concussion protocols – reality/ evidence markers                         |
| NP A.                                                   | A. Nutrition protocols that may support concussion recovery                                |
| <b>NP5 - C</b>                                          | <b>Creatine supplementation protocols</b>                                                  |
| C1                                                      | No true awareness/ knowledge                                                               |
| C2                                                      | Awareness of potential creatine role in concussion recovery                                |
| C3                                                      | Application is not a strategic concussion recovery support protocol?                       |
| C4                                                      | Protocol specific to increase intake of creatine post-concussion event                     |
| <b>NP5- FO</b>                                          | <b>Fish Oil - Omega 3 supplementation</b>                                                  |
| FO1                                                     | No true awareness/ knowledge – application purpose                                         |
| FO2                                                     | Awareness of omega-3 fish oils potential role in concussion                                |
| FO3                                                     | Application is not a strategic concussion recovery support protocol?                       |
| FO4                                                     | Protocols to increase omega 3 intakes post-concussion event                                |

|                 |                                                    |
|-----------------|----------------------------------------------------|
| <b>NP5 -P</b>   | <b>Probiotic - supplementation</b>                 |
| P1              | No true awareness/ knowledge – application purpose |
| P2              | Gut-brain support - Anecdotal evidence             |
| <b>NP5 - Cr</b> | <b>Carb reloading protocol</b>                     |
| C-r1            | Carbohydrate reloading – PN purpose uncertainty    |
| C-r2            | Protocol to carb-reload post-concussion event      |

**Abbreviation notes:** **CR** = Concussion report, **CA** = Concussion awareness, **NC** = Nutrition Consideration (concussion support), **NP** = Nutrition Protocols (concussion support), **C** = Creatine supplementation, **FO** = Fish Oil - Omega 3 supplementation, **P** = Probiotic – supplementation, **C-r** = Carb reloading.
