# Supplementary material for: Nutritional Considerations of Irish Performance Dietitians and Nutritionists in Concussion Injury Management
Source: Nutrients. 2024 Feb 9;16(4):497. doi: 10.3390/nu16040497 (PMC10891776; doi:10.3390/nu16040497)
Supplement: Supplementary file 1 [file nutrients-16-00497-s001.zip]

Archive with 4 entries (4 files):
- S2 - Table S1 1123.pdf
- Supp 1 Figure 1 (A) P3 Thematic analysis 23.jpg
- Supp 1 Figure 1 (B) P4 Thematic analysis 23.jpg
- Supp 1 Figure 1 (C) P4 Thematic analysis 23.jpg
